# Supplementary material
Source: HighWire-hosted journal article supplement (http://dmd.aspetjournals.org/highwire/filestream/74184/field_highwire_adjunct_files/0/88351_Supplemental_figs_tables.pdf)
Supplement: 88351_Supplemental_figs_tables.pdf [file 88351_Supplemental_figs_tables.pdf]

## Supplemental Figures and Tables

MS ID#: DMD/2019/088351

TITLE: The role of L- and D-menthol in the glucuronidation and detoxification of the major lung carcinogen, NNAL

AUTHORS: Shannon Kozlovich, Gang Chen, Christy JW Watson, William J Blot and Philip Lazarus

**Table S1.** Complete screening of menthol and NNAL for individual UGT enzymes.

|         | L-MG           | D-MG | NNAL-N-Gluc <sup>a</sup> | (R)-NNAL-O-Gluc <sup>b</sup> | (S)-NNAL-O-Gluc <sup>b</sup> |
|---------|----------------|------|--------------------------|------------------------------|------------------------------|
| UGT1A1  | - <sup>c</sup> | -    | -                        | -                            | -                            |
| UGT1A3  | -              | -    | -                        | -                            | -                            |
| UGT1A4  | -              | -    | + <sup>c</sup>           | -                            | -                            |
| UGT1A5  | -              | -    | -                        | -                            | -                            |
| UGT1A6  | -              | -    | -                        | -                            | -                            |
| UGT1A7  | +              | -    | -                        | -                            | -                            |
| UGT1A8  | -              | -    | -                        | -                            | -                            |
| UGT1A9  | +              | +    | -                        | +                            | +                            |
| UGT1A10 | +              | +    | -                        | +                            | -                            |
| UGT2A1  | +              | +    | -                        | -                            | -                            |
| UGT2A2  | +              | +    | -                        | -                            | -                            |
| UGT2A3  | +              | +    | -                        | -                            | -                            |
| UGT2B4  | +              | +    | -                        | -                            | -                            |
| UGT2B7  | +              | +    | -                        | -                            | +                            |
| UGT2B10 | -              | -    | +                        | -                            | -                            |
| UGT2B11 | -              | -    | -                        | -                            | -                            |
| UGT2B17 | +              | +    | -                        | +                            | -                            |

<sup>a</sup> Data adapted from Chen et al, 2008.

<sup>b</sup> Data adapted from Kozlovich et al, 2015.

<sup>c</sup> -, no formation of the indicated metabolite detected with the corresponding UGT; +, formation of the indicated metabolite detected with the corresponding UGT.

**Table S2.** Tertile values of each NNK metabolite.<sup>a</sup>

|                         | Low                      | Intermediate | High         | P value                                                                           |
|-------------------------|--------------------------|--------------|--------------|-----------------------------------------------------------------------------------|
| Total MG/mg creatinine  | 0.93 ± 0.14 <sup>b</sup> | 6.4 ± 0.43   | 34 ± 8.1     |                                                                                   |
| NNAL-N-Gluc/free NNAL   | 2.0 ± 0.18               | 1.6 ± 0.13   | 1.7 ± 0.15   | ANOVA, p=0.01<br>Low:Intermediate, p=0.01<br>Low:High, p=0.01                     |
| R-NNAL-O-Gluc/free NNAL | 1.3 ± 0.17               | 1.1 ± 0.13   | 1.2 ± 0.15   | ANOVA, 0.8<br>Low:Intermediate, 0.9<br>Low:High, 0.9                              |
| S-NNAL-O-Gluc/free NNAL | 5.1 ± 0.59               | 3.8 ± 0.36   | 4.9 ± 0.74   | ANOVA, 0.3<br>Low:Intermediate, 0.3<br>Low:High, 0.9                              |
| free NNAL/mg creatinine | 0.16 ± 0.018             | 0.28 ± 0.17  | 0.12 ± 0.020 | ANOVA, 0.07<br>Low:Intermediate, 0.17<br>Low:High, 0.11<br>Intermediate:High, 0.9 |

<sup>a</sup> Tertiles shown are subjects stratified by urinary MG levels. Data were used in Figure 3.

<sup>b</sup> Data are expressed as the mean ± SE.

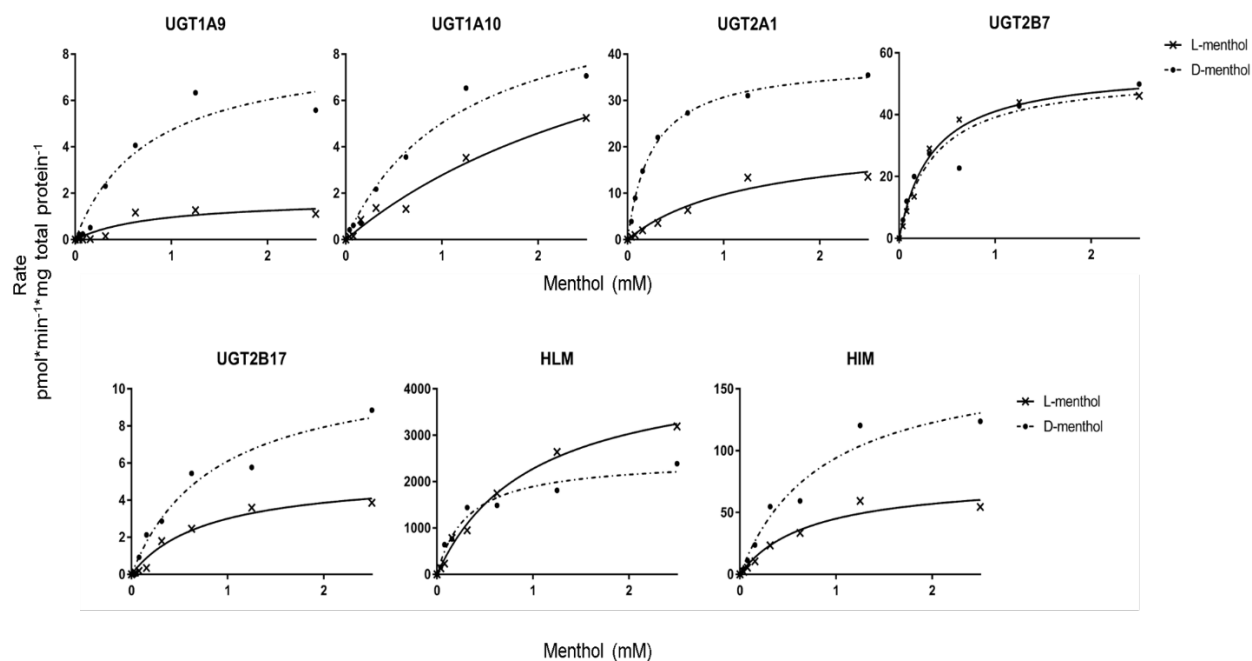

**Figure S1. Representative kinetic curves for the formation of L- and D-menthol glucuronides.** Kinetic assays for L-menthol (x) and D-menthol (•) were performed by incubating each menthol enantiomer (1.0  $\mu$ M – 2.5 mM) with HEK293 UGT-overexpressing cell microsomes. Assays were incubated at 37°C for 30 min. Shown is a representative experiment for each UGT, human liver microsome (HLM) or human intestinal microsomes (HIM); all experiments were performed in triplicate.
